# Research Article

## An herbal drug combination identified by knowledge graph alleviates the clinical symptoms of plasma cell mastitis patients: a nonrandomized controlled trial

Caigang Liu<sup>1,\*</sup>, Hong Yu<sup>1,#</sup>, Guanglei Chen<sup>1,#</sup>, Qichao Yang<sup>2</sup>, Nan Niu<sup>1</sup>, Ling Han<sup>3</sup>, Dongyu Zhao<sup>4</sup>, Manji Wang<sup>5,\*</sup>, Yuanyuan Liu<sup>6</sup>, Yongliang Yang<sup>2,\*</sup>,

<sup>1</sup>*Cancer Stem Cell and Translation Medicine Lab, Innovative Cancer Drug Research and Development Engineering Center of Liaoning Province, Department of Oncology, Shengjing Hospital of China Medical University, Shenyang, 110004, China;*

<sup>2</sup>*School of Bioengineering, Dalian University of Technology, Dalian, 116023, China;*

<sup>3</sup>*National Engineering Research Center of Pharmaceuticals of Traditional Chinese Medicine, China Resources Sanjiu Medical & Pharmaceutical Co., Ltd, Shenzhen, China;*

<sup>4</sup>*International Cancer Institute, Peking University Health Science Center, Peking University, Beijing, 100191, China;*

<sup>5</sup>*Shanghai BeautMed Corporation, Shanghai, 200030, China;*

<sup>6</sup>*Department of Biology, University of Copenhagen, Denmark.*

**Word count of the manuscript text: 3,645**

<sup>#</sup>These authors contributed equally to the work.

<sup>\*</sup>To whom correspondence may be addressed:

**Caigang Liu**, E-mail: angel-s205@163.com; **Address:** Department of Oncology, Shengjing Hospital of China Medical University, Shenyang, 110004, China (**lead contact**)

**Manji Wang**, E-mail: 147304368@qq.com

**Yongliang Yang**, E-mail: everbright99@foxmail.com

## 32 **Abstract**

### 33 ***Background***

34 Plasma cell mastitis (PCM) is a nonbacterial breast inflammation with severe and  
35 intense clinical manifestation yet treatment methods for PCM are still rather limited.  
36 Although the mechanism of PCM remains unclear, mounting evidences suggest that  
37 the dysregulation of immune system is closely associated with the pathogenesis of  
38 PCM. Drug combinations or combination therapy could exert improved efficacy and  
39 reduced toxicity through hitting multiple discrete cellular targets.

### 40 ***Methods***

41 We have developed a knowledge graph architecture towards immunotherapy and  
42 systematic immunity that consists of herbal drug-target interactions with a novel  
43 scoring system to select drug combinations based on target-hitting rates and  
44 phenotype relativeness. To this end, we employed this knowledge graph to identify an  
45 herbal drug combination for PCM and we subsequently evaluated the efficacy of the  
46 herbal drug combination in clinical trial

### 47 ***Results***

48 Our clinical data suggests that the herbal drug combination could significantly reduce  
49 the serum level of various inflammatory cytokines, downregulate serum IgA and IgG  
50 level, reduce the recurrence rate and reverse the clinical symptoms of PCM patients  
51 with improvements of general health status.

### 52 ***Conclusions***

In summary, we reported that an herbal drug combination identified by knowledge graph can alleviate the clinical symptoms of plasma cell mastitis patients. We demonstrated that the herbal drug combination holds great promise as an effective remedy for PCM, acting through the regulation of immunoinflammatory pathways and improvement of systematic immune level. In particular, the herbal drug combination could significantly reduce the recurrence rate of PCM, a major obstacle for PCM treatment. Our data suggests that the herbal drug combination is expected to feature prominently in future PCM treatment.

## ***Funding***

C. Liu's lab was supported by grants from the Public Health Science and Technology Project of Shenyang (Grant: 22-321-32-18); Y. Yang's laboratory was supported by the National Natural Science Foundation of China (Grant: 81874301), the Fundamental Research Funds for Central University (Grant: DUT22YG122) and the Key Research project of 'be Recruited and be in Command' in Liaoning Province (Personal Target Discovery for Metabolic Diseases).

## ***Clinical trial number***

ClinicalTrials.gov: NCT05530226

**Key Words:** Plasma cell mastitis; knowledge graph; traditional herbal medicine; drug combination; clinical trial

## **Introduction**

73 Plasma cell mastitis (PCM) represents as a serious inflammatory condition of  
 74 breast that occurs in young and middle-aged females at non-pregnant and non-  
 75 lactating period<sup>1</sup>. The main histopathological characteristics of PCM is the infiltration  
 76 of plasma cells and lymphocytes in breast tissue<sup>2</sup>. Interestingly, PCM shares similarity  
 77 with breast cancer in the perspective of macroscopical or microscopical  
 78 characteristics<sup>3</sup>. On the other hand, mounting evidences suggest that the dysregulation  
 79 of immune system is closely associated with the pathogenesis of PCM. Recently, the  
 80 incidence rate of PCM is quickly rising yet the treatment methods for PCM are still  
 81 rather limited. In clinical practice, surgical resection and hormone therapy remains as  
 82 two major treatments for PCM. Unfortunately, neither surgical resection nor hormone  
 83 therapy could prevent recurrence of PCM. Moreover, the serious side effects for  
 84 hormone therapy are still problematic<sup>4</sup>. Therefore, the discovery of effective PCM  
 85 treatment or therapeutics with minimal side effects is clearly warranted.

86 Traditional Chinese Medicine (TCM) has a rather long history for the prevention  
 87 and treatment of complex diseases in eastern Asia<sup>5-7</sup>. Moreover, for decades, TCM  
 88 has been often used as alternative or complementary medicine in the west. Indeed,  
 89 Chinese herbal compounds has been successfully applied in the treatment of plasma  
 90 cell mastitis (PCM) in conjunction with western medicine<sup>8</sup>. In clinical practice, TCM  
 91 refers to herbal entity prescription or formulae (also called as ‘Fangji’) which may  
 92 exhibit coordinating or synergistic effects through the combination of multiple herb  
 93 drugs<sup>9</sup>. However, the design of formulae in TCM is solely based on the principle of

94 ‘syndrome differentiation’ according to the medicinal properties of herbal entities.  
95 Moreover, the molecular mechanisms for the ‘formulae’ in TCM remains rather  
96 elusive.

97 Knowledge graph has emerged as an advanced technology in the field of artificial  
98 intelligence which is able to connect entities in a graph based on their existing  
99 intricate relationships<sup>10</sup>. In particular, knowledge graph can enable the rational design  
100 and identification of combination therapies for a specific disease or phenotypes<sup>11</sup>.  
101 Recently, we developed and constructed a knowledge graph for the discovery of  
102 herbal drug combination towards immunotherapy and systematic immunity.  
103 Subsequently, we identified a synergistic combination of herbal drugs for PCM via a  
104 scoring system based on target hitting rates and phenotype relativeness. To verify our  
105 concept of design, we conducted a clinical trial experiment for the drug combination  
106 of herbal compounds mentioned above (ClinicalTrials.gov Registration:  
107 NCT05530226). Strikingly, our clinical results demonstrated that the herbal drug  
108 combination identified by knowledge graph can markedly suppress various  
109 inflammatory cytokines in serum, restore clinical symptoms and reduce the recurrence  
110 rates of PCM patients with improved global health status.

## 111 **Results and Discussion**

112 In previous study, we collected and compiled 240 targets for immunotherapy and  
113 systematic immunity from literature data<sup>12</sup>. Recently, we collected 345 entities of  
114 herbal drugs documented in TCM books and herbal drugs announced by National

Administration of Traditional Chinese Medicine through advanced text-mining techniques. The existing intricate relationships between the herbal drugs and immunotherapy targets were also extracted and compiled via advanced text-mining techniques and manual curation for the construction of knowledge graph. We defined an ontology list consisting of 13 ontology terms describing the relations (edges) between herbal drug entities and the immunotherapy targets based on manual curation of literature data (**Supplemental Materials, Edge\_ontology\_terms**). Moreover, we collected the attributes of the medicinal properties for each herbal compound from Pharmacopoeia of China<sup>13</sup>. Totally, we compiled and integrated 64 attributes of the medicinal properties for herbal drug entities into the knowledge graph (**Supplemental Materials**, attributes of the medicinal properties). These medicinal properties are useful throughout the design of herbal drug combination. Finally, we built the knowledge graph via Neo4j and Py2Neo tools which consists of 895 nodes and 2197 edges (**Figure 1** and **Figure supplement 1**), which can be visited online (<http://www.ikgg.org/>).

Subsequently, we employed a scoring system (or so-called recommendation system) to assess and predict synergistic herbal drug combination from the knowledge graph. Of note, the scoring function is able to identify those herbal drug combinations that are most related with specific phenotypes as well as herbal drug combinations that are able to hit most discrete cellular targets, yet still following the principle of ‘syndrome differentiation’ as described in Pharmacopoeia of China (**Materials and**

136 **Methods**). To this end, we used this scoring function to select herbal drug  
137 combinations consisting of eight herbal entities. We chose to identify drug  
138 combinations with eight entities because ‘formulae’ consisting of eight drugs are  
139 regarded as ‘essence combination’ in TCM community. In short, we employed a  
140 combination generator that is able to randomly generate drug combinations with eight  
141 herbal drug entities for ten rounds, each of which consists of 1,000 random drug  
142 combinations. All the generated drug combinations from the ten rounds were further  
143 ranked and evaluated. Noteworthy, the scoring results of the ten rounds presented as  
144 normal distributions (**Figure 2**). The top twenty combinations from each round ranked  
145 by the scoring function were further curated and inspected by experts in TCM.  
146 Remarkably, we identified a specific drug combination which was ranked among top  
147 twenty choices in all ten rounds of calculation. The combination consists of eight  
148 herbal drug entities including ‘Fructus forsythiae’, ‘Herba violae’, ‘Uniflower  
149 swisscentaury root’, ‘Danshen’, ‘Astragalus’, ‘Taraxacum’, ‘Liquorice’ and  
150 ‘Honeysuckle’ (see **Figure 2**).

151 Next, we extracted the subgraph for the herbal drug combination mentioned  
152 above and created a network diagram for the drug combination via Cytoscape tools<sup>14</sup>  
153 (**Figure 3**). In total, the eight herbal drug entities in the combination regulate 46  
154 cellular targets related to immunotherapy and systematic immunity such as HIF-1,  
155 iNOS, IL-17, IL-6, IL-1 $\beta$ , mTOR, NLPR3, PD-L1, STAT3, TGF- $\beta$ , TLR2 and TLR4  
156 etc. (**Figure 3**). Noteworthy, the medicinal properties of the eight drug entities could

157 be classified into three major categories of ‘Heat-clearing and detoxicating’, ‘Qi-  
158 tonifying’ and ‘Blood-activating menstruation regulating’. Moreover, we conducted  
159 pathway analysis for the herbal drug combination for plasma cell mastitis.  
160 Interestingly, we revealed that the herbal drug combination may modulate a few  
161 pathways related to systematic immunity including ‘Toll-like receptors cascades’,  
162 ‘MAP kinase activation’, Adaptive immune system’, ‘Growth hormone receptor  
163 signaling’, ‘Cytokine signaling in immune system’ and ‘Innate immune system’ via  
164 reactome knowledgebase<sup>15</sup> (**Figure 4 and Supplemental Materials**). We believe all  
165 these may account for the therapeutic profiles of the herbal drug combination towards  
166 PCM.

167 Subsequently, we want to evaluate the efficacy of herbal drug combination in  
168 clinical trial for PCM patients (Clinicaltrials.gov number: NCT05530226). The ‘Jun-  
169 Chen-Zuo-Shi’ principle was examined for the herbal drug combination (‘Formulae’)  
170 by TCM experts and the dosage for each drug entity from the drug combination was  
171 adjusted by TCM experts. The clinical trial is a unrandomized, open label single arm  
172 study investigating the efficacy and safety of the herbal drug combination. To reveal  
173 the therapeutic effects of TCM drug combination, we selected patients who were  
174 treated with western medicine in the real world as comparison. Therefore, the two  
175 groups of patients were divided into TCM treatment group (experimental group) and  
176 western medicine treatment group (control group). All patients were diagnosed with  
177 PCM by biopsy of breast tissue before recruited into the clinical trial. Patients in the



178 CG group (the control group) were orally treated with methylprednisolone whereas  
179 the patients in the EG group (the experimental or treatment group) were orally treated  
180 with herbal drug combination (**Materials and Methods**). Of note,  
181 methylprednisolone is a standard corticosteroid for the treatment of inflammatory  
182 conditions in clinical practice<sup>16</sup> and therefore methylprednisolone is used in the CG  
183 group.

184 Efficacy was assessed every 2 cycles and the results were summarized after six  
185 months of treatment. The baseline characteristics are shown in **Table S1**. Strikingly,  
186 our results demonstrated that a few inflammatory cytokines in the serum including IL-  
187 2, IL-4, IL-6, IFN- $\gamma$ , IL-1 $\beta$  and TNF- $\alpha$  were significantly downregulated in PCM  
188 patients after treatment of herbal drug combination as compared to the CG group  
189 treated with methylprednisolone (**Figure 5**). We chose to measure these cytokines in  
190 the experiments because they are often regarded as serum cytokine markers during the  
191 pathogenic development of PCM<sup>17</sup>. In addition, we found that serum level of IgA and  
192 IgG level were markedly suppressed in the treatment group of herbal drug  
193 combination as compared to the control group (**Figure 6**). Of note, both IgA and IgG  
194 have been found to be crucial diagnostic serum markers for PCM patients<sup>18</sup>. Moreover,  
195 IgA is regarded as a major component of mucosal immunity which is closely related  
196 to the pathogenesis of PCM<sup>19,20</sup>. Therefore, our data suggests that the herbal drug  
197 combination may enable the regulation of mucosal immunity and consequently  
198 downregulate IgA and IgG serum level. Furthermore, we conducted the standard

199 Quality of Life questionnaire studies for PCM patients in the clinical experiment. Our  
200 results implicated that symptom score, pain score and global health status of PCM  
201 patients are significantly improved after treatment of the herbal drug combination as  
202 compared to the control group (**Figure 7**). Noteworthy, our results demonstrated that  
203 the recurrence rate of PCM patients in the treatment group were reduced to 3.75% as  
204 compared to the recurrence rate of 12.5% in the control group (**Table 1**). Moreover,  
205 the incidence rate of adverse events of PCM patients in the treatment group were  
206 reduced to 6.25% as compared to the recurrence rate of 11.25% in the control group  
207 (**Table 1**). In addition, we observed that the clinical symptoms of PCM patients in the  
208 EG group such as swelling, abscess and fistula were reversed (**Figure 8, Table\_S2 in**  
209 **Supplemental File**) after treatment of herbal drug combinations. The clinical  
210 symptom score in the EG group is ~4.68 as compared to the clinical symptom score of  
211 ~5.98 in the CG group (**Table 2**). These results suggest that the herbal drug  
212 combination may achieve better efficacy for the treatment of PCM as compared to  
213 methylprednisolone.

214 With the increasing amount of biomedical data, the traditional drug discovery  
215 campaign has been revolutionized with the aid of artificial intelligence techniques to  
216 accelerate the process and reduce the cost<sup>21</sup>. In recent years, knowledge graph, a  
217 technique that can provide structured relations among entities and unstructured  
218 semantic relations associated with entities, has been introduced into the domain of  
219 drug discovery<sup>11</sup>. Although the pathogenesis of PCM remains largely unclear, there

220 have been numerous reports implicating that the overactivation of  
 221 immunoinflammatory pathways play an important role in the development of PCM<sup>22</sup>.  
 222 The major advantage of using Traditional Chinese Medicine is that herbal drug  
 223 combination can hit multiple discrete targets related to immunoinflammatory  
 224 pathways with improved efficacy and reduced toxicity. Herein, for the first time, we  
 225 showcase an example that identifies an herbal drug combination via knowledge graph  
 226 towards PCM. In contrast to using the conventional principle of ‘syndrome  
 227 differentiation’, our knowledge graph consisting of intricate relations between herbal  
 228 drug entities and immunotherapy targets coupled with scoring functions are able to  
 229 automatically identify novel herbal drug combinations which can hit most discrete  
 230 targets, making this strategy unique in the TCM community. Although we  
 231 acknowledge that the inclusion of chemical ingredients from the herbal drugs may  
 232 impact the outcome of our analysis and design, unfortunately, the inclusion of  
 233 chemical ingredients in the knowledge graph is rather technically difficult due to the  
 234 limited and incomplete datasets for the herbal drugs in the field of TCM. Nevertheless,  
 235 our strategy captures the prominent feature of design for drug combinations towards a  
 236 complex disease such as PCM. In the future, we plan to include multiple types of  
 237 omics data such as genomic, transcriptomic, proteomic, metagenomic or  
 238 metabolomics data into the knowledge graph to reveal novel targets and enable novel  
 239 drug discovery.

240 In the present study, our results revealed that the herbal drug combination  
241 identified by knowledge graph could suppress a few key immunoinflammatory  
242 cytokines, enhance the systematic immune levels and significantly reduce the  
243 recurrence rates of PCM patients. Of note, recurrence has become one major obstacle  
244 after surgical resection for PCM treatment in clinical practice. On the other hand,  
245 hormone therapy may increase the risk of side effects for PCM patients. Therefore,  
246 our approach of herbal drug combination may provide a new avenue for PCM  
247 treatment with less recurrence rate and reduced incidence rate of adverse events.

## 248 **Conclusion**

249 In summary, we report the identification and clinical assessment of an herbal drug  
250 combination towards Plasma cell mastitis (PCM). We demonstrated that the herbal  
251 drug combination holds great promise as an effective remedy for PCM, acting through  
252 the regulation of immunoinflammatory pathways and improvement of systematic  
253 immune level. In particular, the herbal drug combination could significantly reduce  
254 the recurrence rate of PCM, a major obstacle for PCM treatment. Our data suggests  
255 that the herbal drug combination is expected to feature prominently in the future PCM  
256 treatment. Moreover, these promising results underscore the potential of knowledge  
257 graph to identify drug combinations or other novel therapeutics across multiple types  
258 of human disorders.

## 259 **Acknowledgments**

Y. Yang's laboratory was supported by the National Natural Science Foundation of China (Grant: 81874301), the Fundamental Research Funds for Central University (Grant: DUT22YG122) and the Key Research project of 'be Recruited and be in Command' in Liaoning Province (Personal Target Discovery for Metabolic Diseases); C. Liu's lab was supported by grants from the National Natural Science Foundation of China (No. 81572609), China Medical University Major Construction Project (No. 2017ZDZX05) and Liaoning Colleges Innovative Talent Support Program (Cancer Stem Cell Origin and Biological Behavior).

# **Conflict of interest statement**

Ling Han is an employee of China Resources Sanjiu Medical & Pharmaceutical; Manji Wang is an employee of Shanghai BeautMed Corporation.

# **Author Contributions**

Q.Y., and G.C. performed data mining and data curation and constructed the knowledge graph; Q.Y., Y.L. and Y.Y. designed the scoring system for the knowledge graph; Q.Y., and Y.Y. participated in the design and styling of the web interface; D.Z. helped to collect and analyze the medicinal properties of the herbal drug entities; L.H. and N.N. participated in the design of herbal drug combination product; M.W. and G.C. conducted analysis of clinical data and clinical pictures of the PCM patients; H.Y. and N.N. coordinated the clinical trial experiments and

279 registration; C. L. and Y.Y. provided funding for the project; Y.Y. and C.L. initiated,  
280 coordinated the whole project; Y.Y. wrote the manuscript.

## 281 **Declaration of Ethics**

282 The protocol was approved by the Institutional Review Board (IRB) of the China  
283 Medical University (approval number: 2021PS024T). This study was registered with  
284 ClinicalTrials.gov: NCT05530226. All patients provided written informed consent.

285

## 286 **Materials and Methods**

### 287 *Construction of knowledge graph towards immunotherapy*

288 We employed data mining techniques to collect and compile 240 targets of  
289 immunotherapy and systematic immunity from PubMed database. Next, we collected  
290 and compiled 345 herbal drug entities officially released by the National Health  
291 Commission of China and National Administration of Traditional Chinese Medicine.  
292 The intricate relations between the herbal drug entities and the immunotherapy targets  
293 were extracted from the PubMed database. These intricate relations were subjected to  
294 further manual curation. We used thirteen ontology terms (see **Supplemental**  
295 **Materials**) to describe the intricate relations (edges) in the knowledge graph.  
296 Moreover, 64 attributes of the medicinal properties for the herbal drug entities were  
297 collected and compiled from Pharmacopoeia of China. Finally, we built the

298 knowledge graph via Neo4j and Py2Neo tools which consists of 895 nodes and 2197  
299 edges.

### 300 *Scoring system of the knowledge graph*

301 To this end, we developed a scoring system to assess and predict synergistic drug  
302 combination of herbal drug entities (number of drugs,  $n$ ) as below,

$$303 \quad \text{Score} = f(x) * g(x) * \sum_{i=1}^x \left\| \begin{pmatrix} h_1 \\ h_2 \\ h_3 \end{pmatrix} \right\| \quad [1]$$

304 Herein,  $f(x)$  represents as the penalty function.  $f(x)$  value will be set to 0 if the  
305 medicinal properties of the drug combination fall into the contraindication rules in  
306 Pharmacopoeia of China. Otherwise,  $f(x)$  value will be set to 1.

$$307 \quad g(x) = 1 - p_i \quad [2]$$

308  $g(x)$  is the target diversity function as above and  $p_i$  is calculated as  $p_i = w/t$ ;  $t$   
309 refers to the total number of targets within the knowledge graph,  $w$  refers to the total  
310 number of overlapping targets that the drug combination may hit. Hence, the target  
311 diversity function can be used as a measure to assess the diversity of the targets that  
312 the drug combination may hit. In another word, if each drug entity in the combination  
313 hits distinct targets, the  $g(x)$  value will be set to 1. The last term of the scoring  
314 system is used as a measure to assess the relativeness of each drug entity in the  
315 combination and calculated as follows,

$$316 \quad \sum_{i=1}^x \left\| \begin{pmatrix} h_1 \\ h_2 \\ h_3 \end{pmatrix} \right\| \quad [3]$$

In brief,  $h_1$  represents the target hitting rates of each drug entity in the combination and was calculated as follows,  $h_1 = n_i/t$ ;  $n_i$  is the number of hitting targets for each drug entity in the combination; Again,  $t$  refers to the total number of targets constituting the knowledge graph for the disease; Noteworthy, the concept of hitting rates towards discrete targets has been used in the scoring function for the selection of synergistic drug combinations<sup>23</sup>.  $h_2$  represents the phenotype relativeness of each drug entity in the combination and  $h_2 = c_2 * 1/x$ , where  $x$  is the number of drug entities in the combination and  $c_2$  is the parameter; Namely, if the drug entity is related to the phenotype of the disease (co-occurrence with the disease phenotype in the literature), then  $c_2$  value is set to 1 otherwise  $c_2$  value is set to 0;  $h_3$  represents the literature relativeness or confidence of each drug entity in the combination and calculated as follows,

$$h_3 = c_3 * \log \sqrt{\sum_{i=1}^x l \times (j + k)} \quad [4]$$

in which  $l$  is the number of studies/publications that validated the association of drug entity with the specific disease (herein in the knowledge graph refers to cancer immunotherapy),  $j$  and  $k$  refer to if the relations of the drug entity with the disease have been validated in cell lines or patient (or animal) tissues, respectively. Namely, if the drug entity was validated in cancer cell lines or patient tissues, the  $j$  or  $k$  value will be set to 1, respectively. Otherwise, the  $j$  or  $k$  value will be set to 0;  $c_3$  is the parameter and set to 1 here. Therefore, herein, a high score of  $h_3$  implicates that the drug combination is more relevant to cancer immunotherapy with high confidence of



literature relativeness. Collectively, our scoring system can be used to select those drug combinations that are most relevant with disease phenotypes and those drug combinations that are able to hit most discrete targets related to immunotherapy.

### ***Design of the clinical trial***

In brief, 160 female patients diagnosed as plasma cell mastitis (PCM) in Shengjing Hospital Affiliated to China Medical University were recruited in the clinical trial between January 2021 to February 2022. Patients were randomly 1:1 divided into experimental group (EG) and control group (CG). Noteworthy, in order to demonstrate the therapeutic effect of TCM drug combination, we selected patients who were treated with western medicine in the real world during the same period. Therefore, the two groups of patients were divided into TCM treatment group (experimental group) and western medicine treatment group (control group). There was no significant difference in baseline data such as age, body mass index, clinical classification, marriage and child-bearing history between the two groups (**Supplemental File, Table\_S1**). Patients in the CG group were orally treated with methylprednisolone tablets, 20mg/ day once a day. The patients in the EG group were orally treated with 20g/bag of herbal drug combination twice a day, once in the morning and once in the evening for 2 months. The herbal drug combination was prepared as granules in the following formulae: Taraxacum 15g, Fructus forsythiae 15g, Honeysuckle 10g, Uniflower swisscentaury root 8g, Herba violae 20g, Danshen 10g, Astragalus 20g, Liquorice 8g. The herbal drug combination in the form of

granules was provided and prepared by Shengjing Hospital Affiliated to China Medical University.

### ***Clinical trial protocol***

The clinical trial for the herbal drug combination was registered at ClinicalTrials.gov and entitled as “A Single Arm Study of Traditional Chinese Medicine for Plasma Cell Mastitis” with registration code of NCT05530226. The detailed clinical trial protocol has been provided a separate document in the Supplemental Files named as ‘PCM\_Clinical\_Protocol’.

### ***Measurement of serum inflammatory cytokines by ELSIA assay***

Venous blood of the CG and EG groups were collected in sterile non-anticoagulant test tube before and after treatment. The immune transmission turbidimetry was used according to the procedure of CRP kit and automatic biochemical analyzer was used to detect the level of CRP. The levels of serum cytokines were measured by ELISA (Elabscience) according to the manufacturer’s instructions.

### ***Measurement of serum immunoglobulin level***

The venous blood of PCM patients in the two groups were collected in sterile non-anticoagulant tube before and after treatment. The serum IgG and IgA were measured by rate scattering turbidimetry using Array 360 System automatic specific protein analyzer (Beckman Company, USA).

### ***Assessment of clinical symptoms of PCM patients***

379 The clinical symptoms were evaluated by attending physician with board certification  
380 in pathology. The patients were scored before and after treatment according to the  
381 standard rating scale for PCM (see **Supplemental Materials**).

## 382 *Statistics*

383 All data were evaluated as mean  $\pm$  SEM. Statistical analysis of the quantitative  
384 multiple group comparisons was performed using the one-way analysis of variance  
385 (ANOVA) followed by Tukey's test; whereas pairwise comparisons were performed  
386 using the t test by GraphPad Prism 8 (Graph Pad Software, La Jolla, CA, USA).  
387 Results were considered to be statistically significant with  $p < 0.05$ .

## Figures

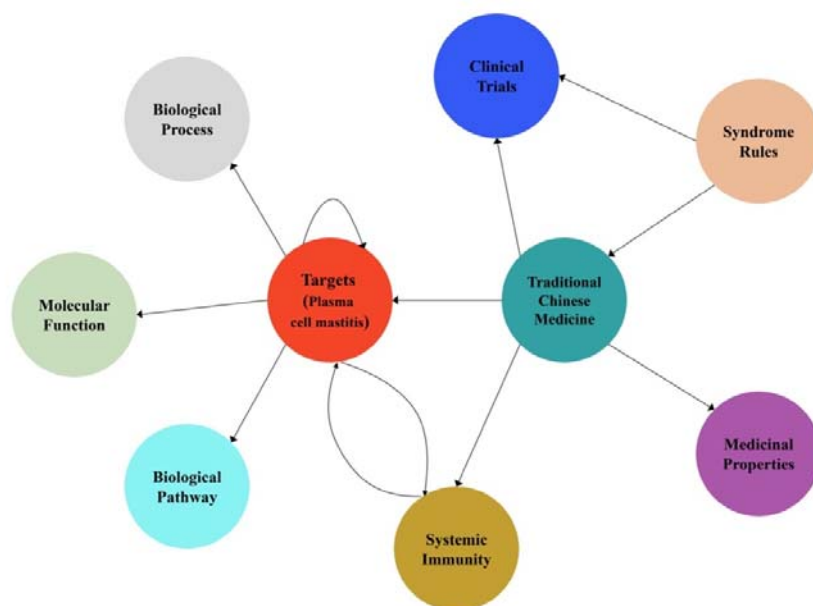

**Figure 1.** Schematic diagram of the knowledge graph for the drug discovery of plasma cell mastitis in the present work.

402

403

404

405

406

407

408

409

410

411

412 **Figure 1 - Figure supplement 1.** Snapshot of the medical knowledge graph towards  
 413 immunotherapy. The knowledge graph was constructed by Neo4j and Python tools  
 414 (<http://www.ikgg.org/kghti>).  
 415

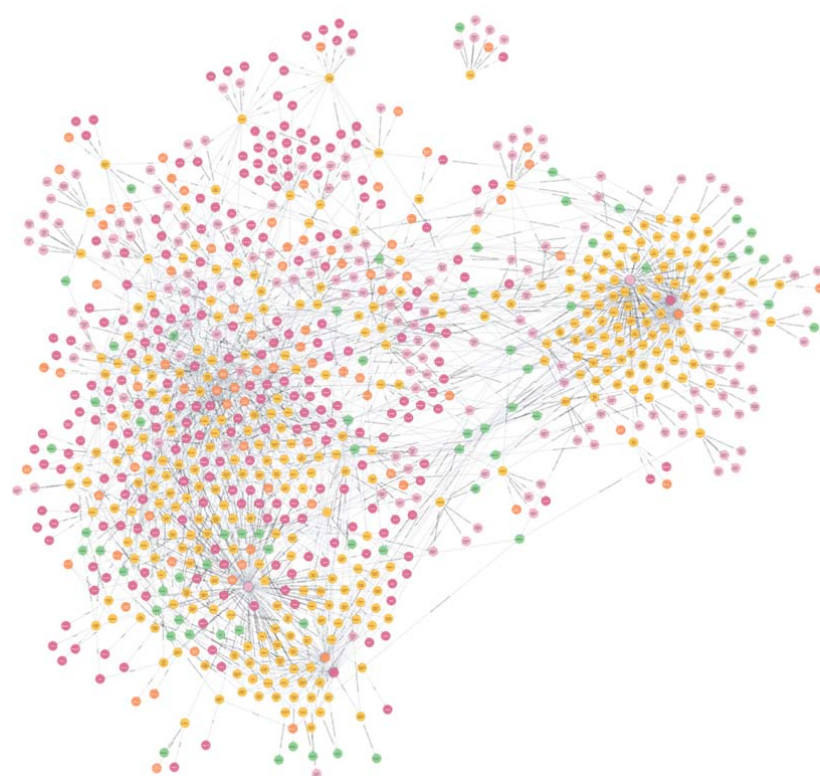

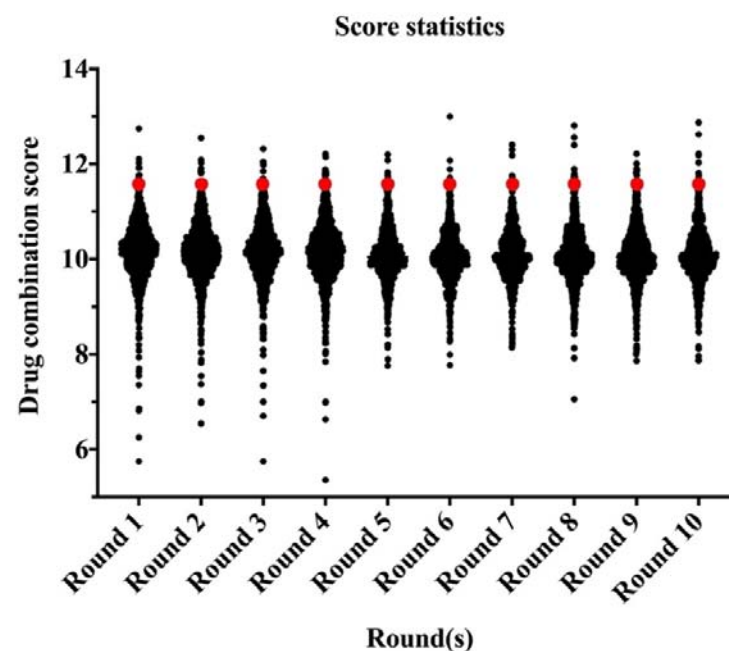

416

417

418

419 **Figure 2.** The score statistics of ten rounds of random herbal drug combinations  
 420 (1,000 random combination from each round) for the treatment of plasma cell mastitis.  
 421 Noteworthy, the scoring results of the ten rounds presented as normal distributions.  
 422 The herbal drug combination identified for the clinical trial was among the top twenty  
 423 choices in all the ten rounds and marked in red dots.

424

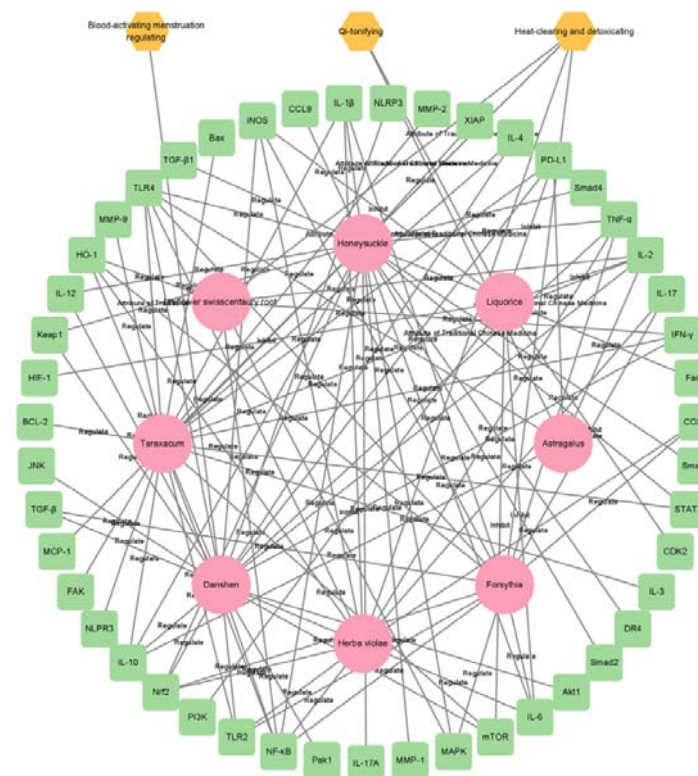

**Figure 3.** Network diagram of the herbal drug combination consisting of eight entities including ‘Honeysuckle’, ‘Taraxacum’, ‘Astragalus’, ‘Danshen’, ‘Forsythia’, ‘Herba violae’, ‘Liquorice’ and ‘Uniflower swisscentaury root’ displayed in red circles. In total, 46 cellular targets related to systemic immunity were hit by the drug combination such as NLPR3, IL-17, TLR4, STAT3, IL-6, iNOS and TLR2 et al which were displayed in green box model. Three major medicinal attributes (properties) were identified for these herbal drug entities including ‘Heat-clearing and detoxicating’, ‘Qi-tonifying’ and ‘Blood-activating menstruation regulation’.

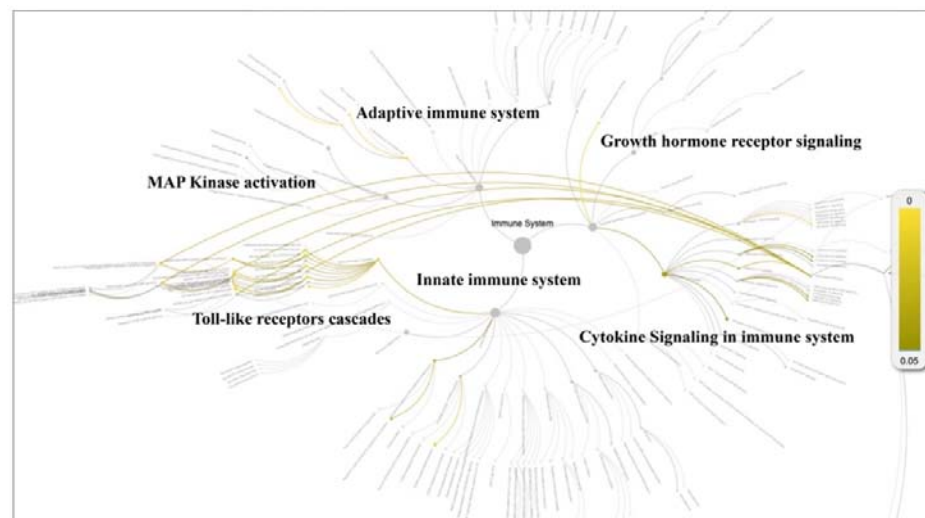

**Figure 4.** Pathway analysis for the potential cellular targets of the herbal drug combination via reactome knowledgebase. The statistically significant pathways were highlighted and displayed in yellow color (P<0.05).



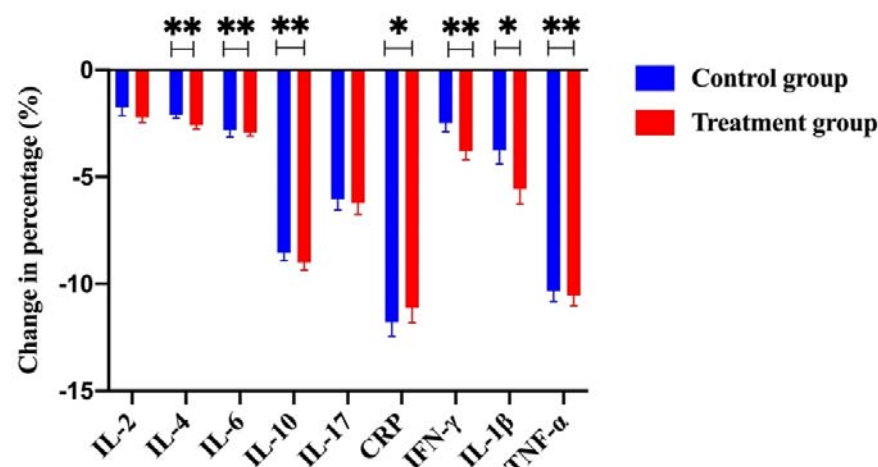

**Figure 5.** The change of percentage for numerous immunological cytokines including IL-2, IL-4, IL-6, IL-10, IL-17, CRP, IFN-γ, IL-1β and TNF-α from the control group and the treatment group (with TCM treatment). Notably, a few key cytokines such as IL-2, IL-4, IFN-γ, IL-1β and TNF-α were significantly downregulated in the treatment group as compared to the control group.

**Figure 5 – source data.** Patients' raw data of serum cytokines from the control group (without TCM treatment) and the treatment group (with TCM treatment) in the clinical trial (ClinicalTrials.gov: NCT05530226).

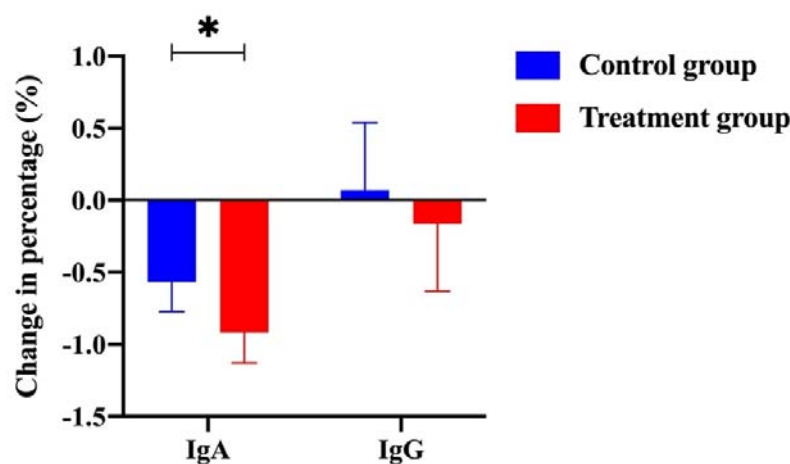

**Figure 6.** The change of percentage for IgA level and IgG level from the control group and the treatment group (with TCM treatment).

**Figure 6 – source data.** Patients' raw data of serum IgA and IgG level from the control group (without TCM treatment) and the treatment group (with TCM treatment) in the clinical trial (ClinicalTrials.gov: NCT05530226).

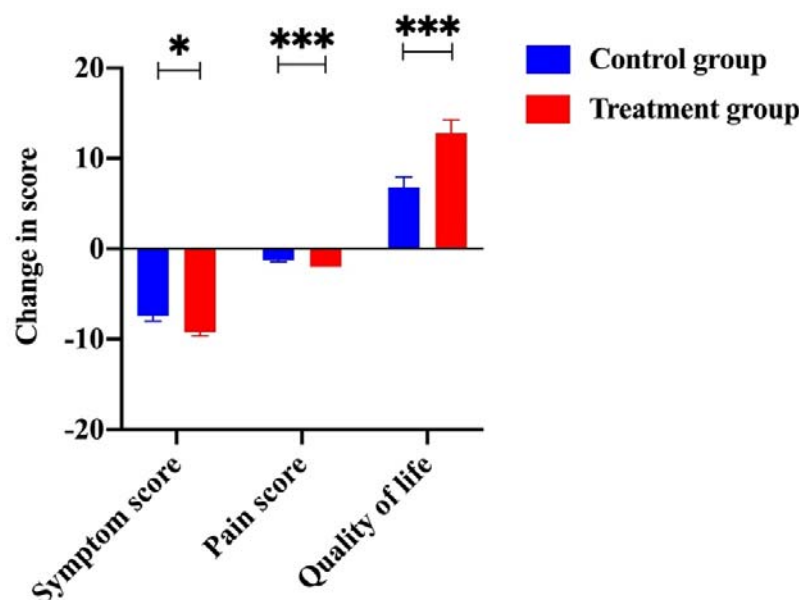

**Figure 7.** The change of scores from items including symptom, pain and living quality. The scores of symptoms, pain and living quality from the treatment group were significantly improved as compared to the control group.

**Figure 7 – source data 1.** Patients’ raw data of symptom scores from the control group (without TCM treatment) and the treatment group (with TCM treatment) in the clinical trial (ClinicalTrials.gov: NCT05530226).

**Figure 7 – source data 2.** Patients’ raw data of pain scores from the control group (without TCM treatment) and the treatment group (with TCM treatment) in the clinical trial (ClinicalTrials.gov: NCT05530226).

**Figure 7 – source data 3.** Patients’ raw data of quality of life from the control group (without TCM treatment) and the treatment group (with TCM treatment) in the clinical trial (ClinicalTrials.gov: NCT05530226).

509

510

511

512

513

514

515

516

517

518 **Figure 8.** The comparison of whole breast for six representative PCM patients in the  
519 EG group before treatment and after treatment (written informed consents have been  
520 provided from all the patients).  
521

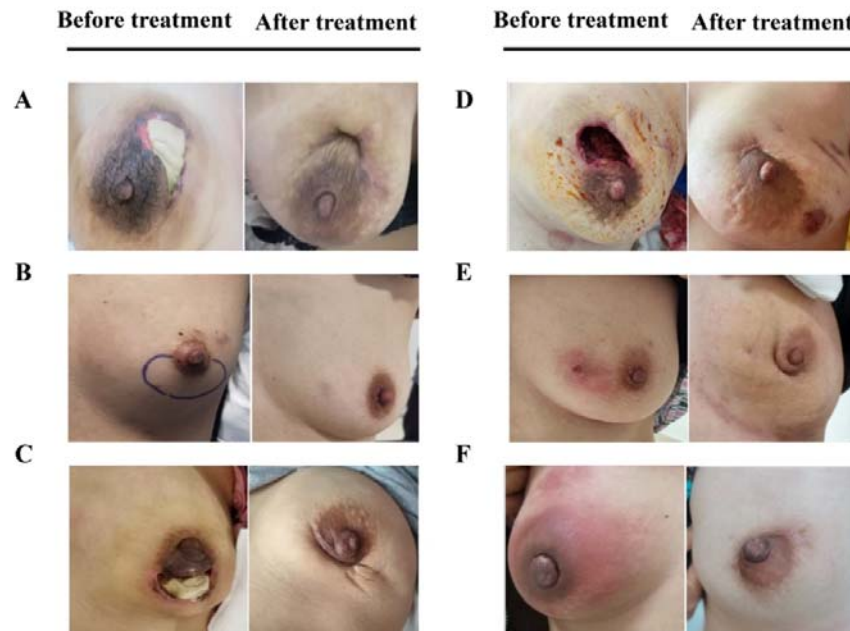

522 **Table 1.** Comparison of operation rate, recurrence rate and incidence of adverse

523 reactions between the two groups (EG: experimental group; CG: control group).

524

| Groups         | N<br>(Patients) | Operation   | Recurrence | Incidence of<br>adverse events |
|----------------|-----------------|-------------|------------|--------------------------------|
| EG             | 80              | 25 (31.25%) | 3 (3.75%)  | 5 (6.25%)                      |
| CG             | 80              | 47 (58.75%) | 10 (12.5%) | 9 (11.25%)                     |
| X <sup>2</sup> |                 | 12.22       | 4.103      | 1.252                          |
| p              |                 | <0.001      | 0.043      | 0.263                          |

525

**Table 2.** Clinical symptom scores between the two groups in the clinical trial (EG: experimental group; CG: control group; The clinical symptom rating scale for PCM was displayed in Table\_S2 in the Supplemental File).

| Groups | N<br>(Patients) | Baseline    | Treated   | t      | p      |
|--------|-----------------|-------------|-----------|--------|--------|
| EG     | 80              | 13.90±2.37  | 4.68±3.40 | 22.19  | <0.001 |
| CG     | 80              | 13.423±2.70 | 5.98±3.68 | 14.282 | <0.001 |
| t      |                 | 1.189       | 2.323     |        |        |
| p      |                 | 0.236       | 0.021     |        |        |

## References

1. Cutler, M. Plasma-cell mastitis; report of a case with bilateral involvement. *Br Med J* **1**, 94-96 (1949).
2. Yu, J.J., *et al.* Mouse model of plasma cell mastitis. *J Transl Med* **10 Suppl 1**, S11 (2012).
3. Cheng, L., *et al.* Mastitis, a Radiographic, Clinical, and Histopathologic Review. *Breast J* **21**, 403-409 (2015).
4. Fleming, L., *et al.* The impact of medication side effects on adherence and persistence to hormone therapy in breast cancer survivors: A quantitative systematic review. *Breast* **64**, 63-84 (2022).
5. Tu, Y. The discovery of artemisinin (qinghaosu) and gifts from Chinese medicine. *Nat Med* **17**, 1217-1220 (2011).
6. Tu, Y. Artemisinin-A Gift from Traditional Chinese Medicine to the World (Nobel Lecture). *Angew Chem Int Ed Engl* **55**, 10210-10226 (2016).
7. Yin, X., *et al.* Effect of Electroacupuncture on Insomnia in Patients With Depression: A Randomized Clinical Trial. *JAMA Netw Open* **5**, e2220563 (2022).
8. Zhang, J., Xu, J., Zhang, J. & Ren, Y. Chinese herbal compound combined with western medicine therapy in the treatment of plasma cell mastitis: A protocol for systematic review and meta-analysis. *Medicine (Baltimore)* **99**, e22858 (2020).
9. Li, S., Zhang, B., Jiang, D., Wei, Y. & Zhang, N. Herb network construction and co-module analysis for uncovering the combination rule of traditional Chinese herbal formulae. *BMC Bioinformatics* **11 Suppl 11**, S6 (2010).
10. Ye, Q., *et al.* A unified drug-target interaction prediction framework based on knowledge graph and recommendation system. *Nat Commun* **12**, 6775 (2021).
11. Zeng, X., Tu, X., Liu, Y., Fu, X. & Su, Y. Toward better drug discovery with knowledge graph. *Curr Opin Struct Biol* **72**, 114-126 (2022).
12. Zhang, Y., *et al.* Checkpoint therapeutic target database (CKTTD): the first comprehensive database for checkpoint targets and their modulators in cancer immunotherapy. *J Immunother Cancer* **8**(2020).
13. Hao, Y.F. & Jiang, J.G. Origin and evolution of China Pharmacopoeia and its implication for traditional medicines. *Mini Rev Med Chem* **15**, 595-603 (2015).
14. Reimand, J., *et al.* Pathway enrichment analysis and visualization of omics data using g:Profiler, GSEA, Cytoscape and EnrichmentMap. *Nat Protoc* **14**, 482-517 (2019).
15. Jassal, B., *et al.* The reactome pathway knowledgebase. *Nucleic Acids Res* **48**, D498-D503 (2020).
16. Lv, J., *et al.* Effect of Oral Methylprednisolone on Clinical Outcomes in Patients With IgA Nephropathy: The TESTING Randomized Clinical Trial. *JAMA* **318**, 432-442 (2017).

575 17. Liu, Y., *et al.* Activation of the IL-6/JAK2/STAT3 pathway induces plasma  
576 cell mastitis in mice. *Cytokine* **110**, 150-158 (2018).  
577 18. Xing, M., Zhang, S., Zha, X. & Zhang, J. Current Understanding and  
578 Management of Plasma Cell Mastitis: Can We Benefit from What We Know?  
579 *Breast Care (Basel)* **17**, 321-329 (2022).  
580 19. Betts, C.B., *et al.* Mucosal Immunity in the Female Murine Mammary Gland.  
581 *J Immunol* **201**, 734-746 (2018).  
582 20. Bharathan, M. & Mullarky, I.K. Targeting mucosal immunity in the battle to  
583 develop a mastitis vaccine. *J Mammary Gland Biol Neoplasia* **16**, 409-419  
584 (2011).  
585 21. Yang, Y., Adelstein, S.J. & Kassis, A.I. Target discovery from data mining  
586 approaches. *Drug Discov Today* **14**, 147-154 (2009).  
587 22. Liu, Y., *et al.* IL-6/STAT3 signaling pathway is activated in plasma cell  
588 mastitis. *Int J Clin Exp Pathol* **8**, 12541-12548 (2015).  
589 23. Jin, W., *et al.* Deep learning identifies synergistic drug combinations for  
590 treating COVID-19. *Proc Natl Acad Sci U S A* **118**(2021).  
591  
592
